# Supplementary material
Source: publisher site journal article supplement (https://www.dovepress.com/article/435726)
Supplement: Supplementary file 1 [file get_supplementary_file.php]

**Supplementary Material**

# Supplementary Figures

**
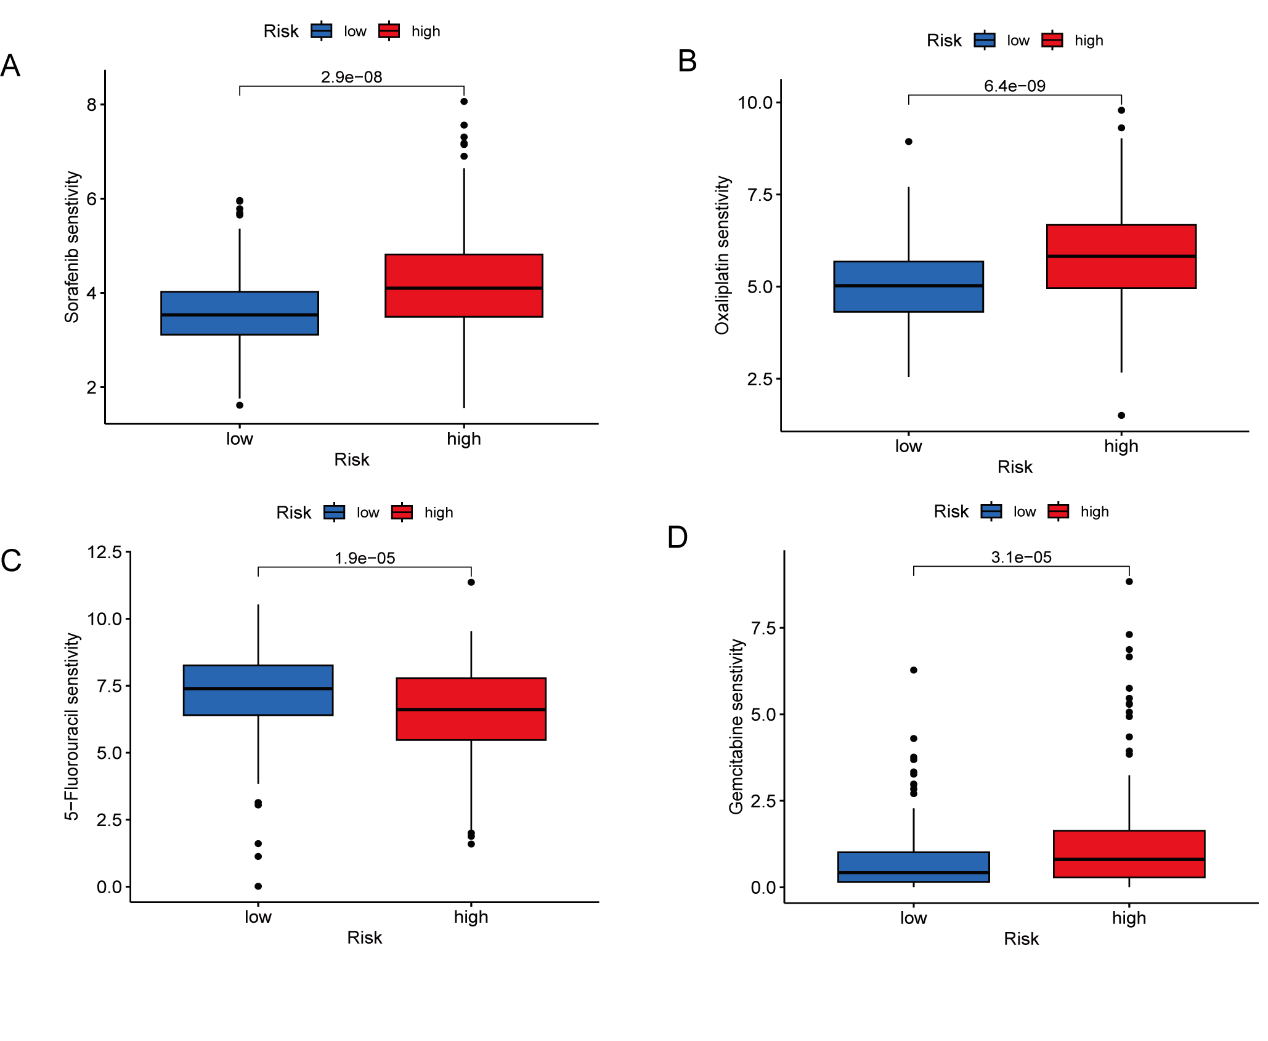
 Supplementary Figure 1**(A-D) The discovery of new potential drugs that target the disulfidptosis-related lncRNAs model
